# Supplementary material for: Controllable synthesis of Fe3O4-wollastonite adsorbents for efficient heavy metal ions/oxyanions removal
Source: Springer Nature journal article supplement (doi:10.1007/s11356-019-04625-0), 2019-03-07
Supplement: MOESM1 [file 11356_2019_4625_MOESM1_ESM.pdf]

Supplementary material for the article:

Rusmirović, J.D., Obradović, N., Perendija, J., Umićević, A., Kapidžić, A., Vlahović, B., Pavlović, V., Marinković, A.D., Pavlović, V.B., 2019. Controllable synthesis of Fe<sub>3</sub>O<sub>4</sub>-wollastonite adsorbents for efficient heavy metal ions/oxyanions removal. *Environ Sci Pollut Res* 26, 12379–12398. <https://doi.org/10.1007/s11356-019-04625-0>

## Supplementary material

# Controllable Synthesis of Fe<sub>3</sub>O<sub>4</sub>-Wollastonite Adsorbents for Efficient Heavy Metal Ions/Oxyanions Removal

Jelena D. Rusmirović<sup>1\*</sup>, Nina Obradović<sup>2</sup>, Jovana Perendija<sup>3</sup>, Ana Umićević<sup>4</sup>, Ana Kapidžić<sup>4</sup>, Branislav Vlahović<sup>5</sup>, Vera Pavlović<sup>6</sup>, Aleksandar D. Marinković<sup>7</sup>, Vladimir B. Pavlović<sup>2,8</sup>

<sup>1</sup>*Innovation Center of the Faculty of Technology and Metallurgy, University of Belgrade, Karnegijeva 4, 11120 Belgrade, Serbia, jrusmirovic@tmf.bg.ac.rs*

<sup>2</sup>*Institute of Technical Sciences of SASA, Knez Mihailova 35/IV, 11000 Belgrade, Serbia*

<sup>3</sup>*Institute of Chemistry, Technology and Metallurgy, University of Belgrade, Njegoševa 4, 11000, Serbia*

<sup>4</sup>*Vinča Institute of Nuclear Sciences, University of Belgrade, Serbia*

<sup>5</sup>*North Carolina Central University, Department of Mathematics and Physics, Durham, United States*

<sup>6</sup>*Faculty of Mechanical Engineering, Kraljice Marije 16, 11120 Belgrade, Serbia*

<sup>7</sup>*Faculty of Technology and Metallurgy, University of Belgrade, Karnegijeva 4, 11120 Belgrade, Serbia*

<sup>8</sup>*Faculty of Agriculture, University of Belgrade, Nemanjina 6, 11080 Belgrade-Zemun, Serbia*

\* **Corresponding author:** Jelena Rusmirović, Innovation Center of the Faculty of Technology and Metallurgy, University of Belgrade, Karnegijeva 4, 11120 Belgrade, Serbia, jrusmirovic@tmf.bg.ac.rs

## Scanning electron microscopy (SEM)

**Table S1.** EDS mapping results of WL/MG and WL- $\gamma$ -APS/MG adsorbents

| WL/MG adsorbent                |           |                        |         |        |           |                  |
|--------------------------------|-----------|------------------------|---------|--------|-----------|------------------|
| Element                        | Line Type | Apparent Concentration | k Ratio | Wt%    | Wt% Sigma | Standard Label   |
| C                              | K series  | 1.51                   | 0.01510 | 13.92  | 0.10      | C Vit            |
| O                              |           |                        |         | 55.13  |           |                  |
| Si                             | K series  | 4.35                   | 0.03449 | 8.34   | 0.03      | SiO <sub>2</sub> |
| Ca                             | K series  | 9.79                   | 0.08749 | 18.24  | 0.05      | Wollastonite     |
| Fe                             | K series  | 1.93                   | 0.01929 | 4.37   | 0.05      | Fe               |
| Total:                         |           |                        |         | 100.00 |           |                  |
| WL- $\gamma$ -APS/MG adsorbent |           |                        |         |        |           |                  |
| Element                        | Line Type | Apparent Concentration | k Ratio | Wt%    | Wt% Sigma | Standard Label   |
| C                              | K series  | 1.94                   | 0.01942 | 16.78  | 0.06      | C Vit            |
| O                              |           |                        |         | 57.44  |           |                  |
| Si                             | K series  | 2.54                   | 0.02011 | 5.04   | 0.02      | SiO <sub>2</sub> |
| Ca                             | K series  | 5.02                   | 0.04489 | 9.38   | 0.02      | Wollastonite     |
| Fe                             | K series  | 5.02                   | 0.05016 | 11.36  | 0.04      | Fe               |
| Total:                         |           |                        |         | 100.00 |           |                  |

## Effect of pH on $\text{Cd}^{2+}$ and $\text{Ni}^{2+}$ ions removal by W-MG and W- $\gamma$ -APS/MG

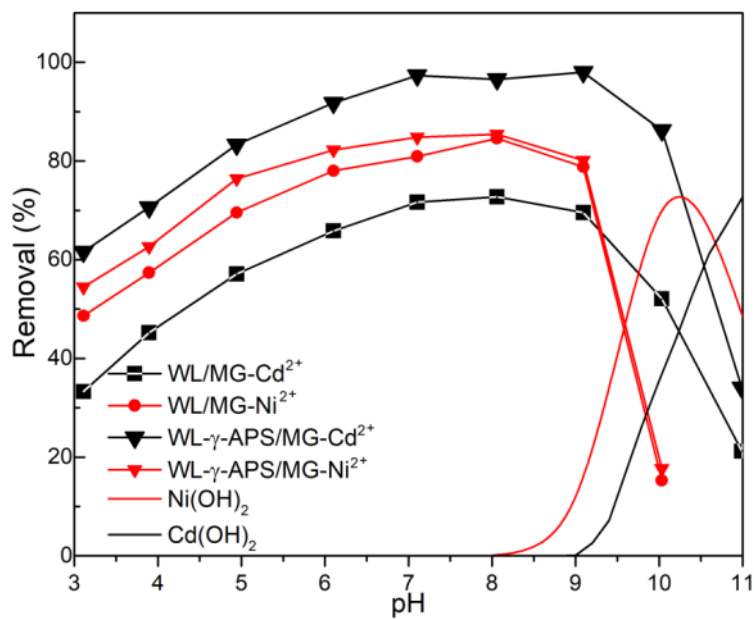

**Figure S1.** Influence of pH on  $\text{Cd}^{2+}$  and  $\text{Ni}^{2+}$  ions removal by W-MG and W- $\gamma$ -APS/MG ( $C_i[\text{Cd}^{2+}] = C_i[\text{Ni}^{2+}] = 10 \mu\text{g l}^{-1}$ ,  $m/V = 125 \text{mg l}^{-1}$ ,  $T = 308\text{K}$ )

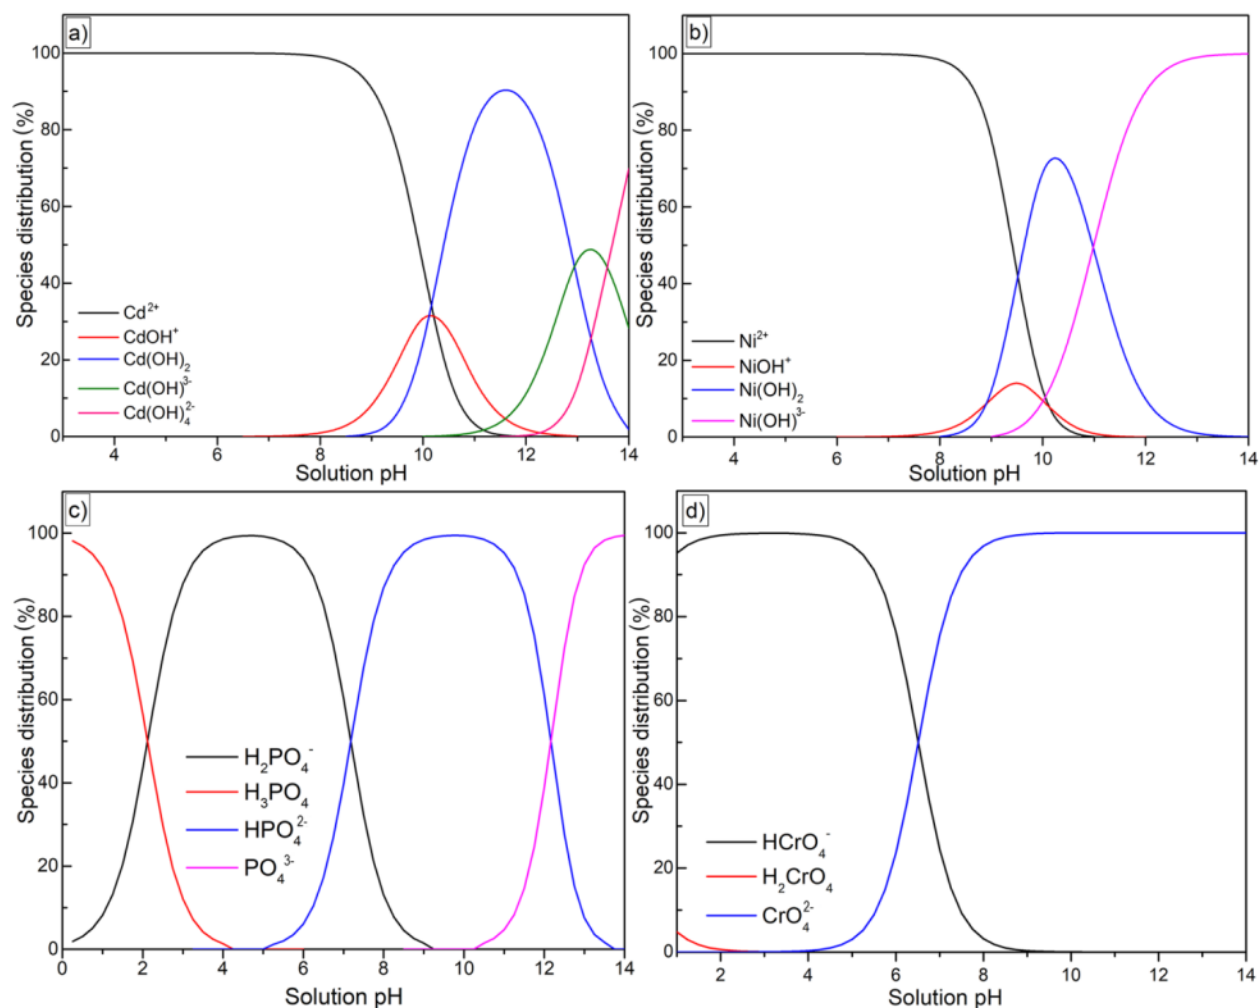

**Figure S2.** Speciation of: a)  $\text{Cd}^{2+}$ , b)  $\text{Ni}^{2+}$ , c)  $\text{H}_2\text{PO}_4^-/\text{HPO}_4^{2-}$  and d)  $\text{HCrO}_4^-/\text{CrO}_4^{2-}$  obtained using MINTEQA. 3.0 software ( $C = 25\text{mg l}^{-1}$ ,  $T = 308\text{K}$ )

**Adsorption/desorption study of  $\text{Cd}^{2+}$ ,  $\text{Ni}^{2+}$ ,  $\text{HCrO}_4^-/\text{CrO}_4^{2-}$  and  $\text{H}_2\text{PO}_4^-/\text{HPO}_4^{2-}$  on WL/MG and WL- $\gamma$ -APS/MG adsorbents.**

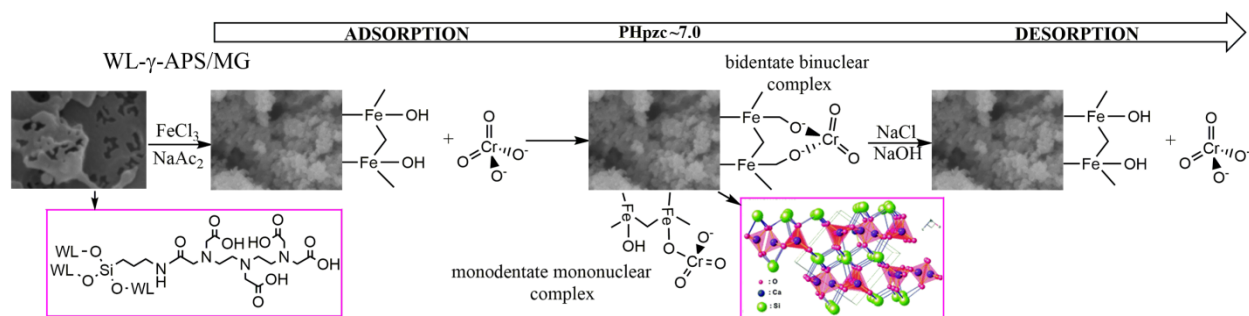

**Figure S3.** Schematic illustration of formation of monodentate and bidentate complexes between MG modified WL and  $\text{HCrO}_4^-/\text{CrO}_4^{2-}$  ions

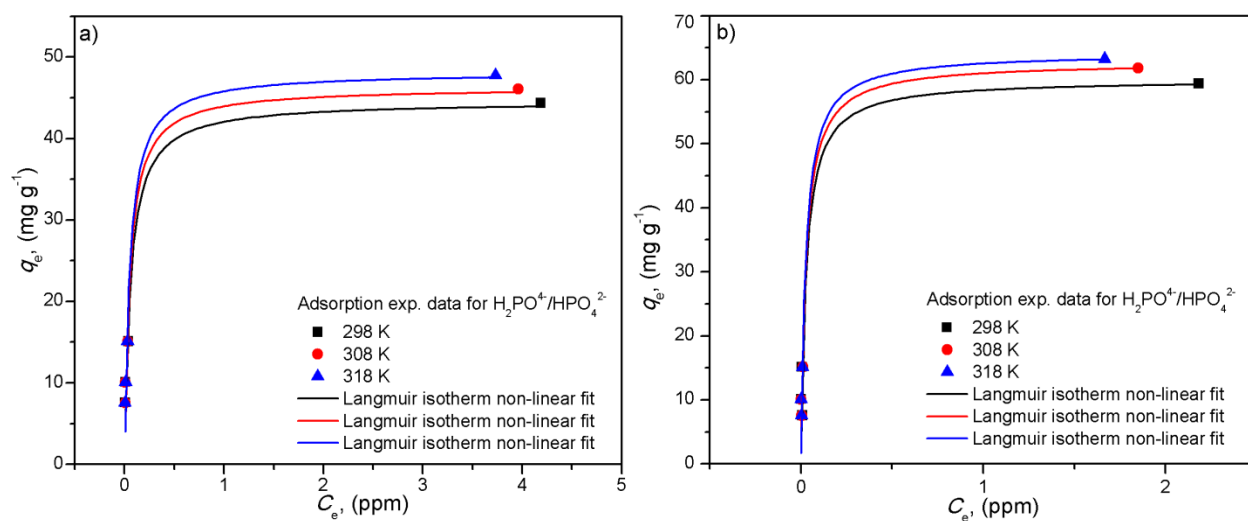

**Figure S4.** Non-linear Langmuir adsorption isotherms for  $\text{H}_2\text{PO}_4^-/\text{HPO}_4^{2-}$  ions on a) WL-MG and b) WL- $\gamma$ -APS/MG adsorbents at 298, 308 and 318K. Lines: non-linear Langmuir model ( $m_{\text{adsorbent}} = 1.0, 1.5, 2.5, 5.0, 7.5$  and  $10$  mg,  $C_i = 10$  ppm, pH 6.5 for  $\text{H}_2\text{PO}_4^-/\text{HPO}_4^{2-}$ )

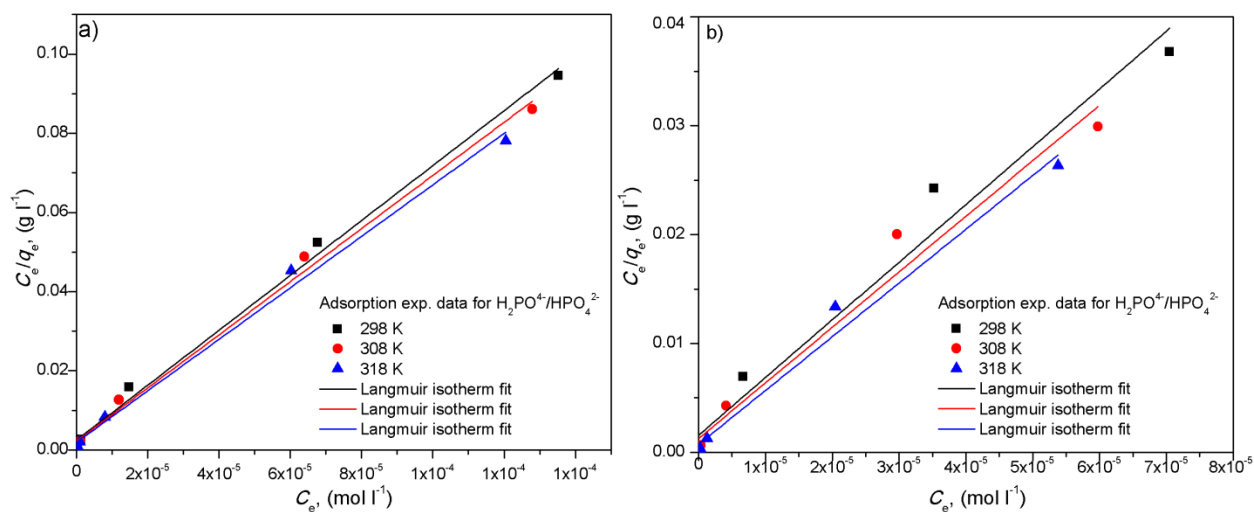

**Figure S5.** Linear Langmuir adsorption isotherms for  $\text{H}_2\text{PO}_4^-/\text{HPO}_4^{2-}$  ions on a) WL-MG and b) WL- $\gamma$ -APS/MG adsorbents at 298, 308 and 318K. Lines: Langmuir model ( $m_{\text{adsorbent}} = 1.0, 1.5, 2.5, 5.0, 7.5$  and  $10$  mg,  $C_i = 10$  ppm, pH 6.5 for  $\text{H}_2\text{PO}_4^-/\text{HPO}_4^{2-}$ )

**Table S2.** Linear Langmuir isotherm parameters for Cd<sup>2+</sup> and Ni<sup>2+</sup> ions obtained at 298, 308 and 318 K using WL/MG and WL- $\gamma$ -APS/MG adsorbents

|                      | Cd <sup>2+</sup> |                                               |                                   |                                                |                       | Ni <sup>2+</sup>                              |                                   |                                                |                       |  |
|----------------------|------------------|-----------------------------------------------|-----------------------------------|------------------------------------------------|-----------------------|-----------------------------------------------|-----------------------------------|------------------------------------------------|-----------------------|--|
|                      | <i>T</i><br>(K)  | <i>q<sub>e</sub></i><br>(mg g <sup>-1</sup> ) | <i>K</i><br>(l mg <sup>-1</sup> ) | <i>K<sub>L</sub></i><br>(l mol <sup>-1</sup> ) | <i>R</i> <sup>2</sup> | <i>q<sub>e</sub></i><br>(mg g <sup>-1</sup> ) | <i>K</i><br>(l mg <sup>-1</sup> ) | <i>K<sub>L</sub></i><br>(l mol <sup>-1</sup> ) | <i>R</i> <sup>2</sup> |  |
| WL/MG                | 298              | 51.015                                        | 26.676                            | 83933651                                       | 0.997                 | 48.538                                        | 26.404                            | 83074307                                       | 0.992                 |  |
|                      | 308              | 53.961                                        | 28.122                            | 88487326                                       | 0.996                 | 50.926                                        | 27.729                            | 87248571                                       | 0.996                 |  |
|                      | 318              | 55.749                                        | 29.555                            | 92993521                                       | 0.995                 | 52.406                                        | 29.516                            | 92869758                                       | 0.998                 |  |
| WL- $\gamma$ -APS/MG | 298              | 69.020                                        | 39.668                            | 124812921                                      | 0.968                 | 61.553                                        | 26.261                            | 124812921                                      | 0.997                 |  |
|                      | 308              | 69.951                                        | 54.374                            | 171085536                                      | 0.997                 | 63.267                                        | 33.136                            | 171085536                                      | 0.995                 |  |
|                      | 318              | 73.145                                        | 59.432                            | 187002496                                      | 0.997                 | 66.140                                        | 35.528                            | 187002496                                      | 0.994                 |  |

**Table S3.** Linear Langmuir isotherm parameters for H<sub>2</sub>PO<sub>4</sub><sup>-</sup>/HPO<sub>4</sub><sup>2-</sup> and HCrO<sub>4</sub><sup>-</sup>/CrO<sub>4</sub><sup>2-</sup> ions obtained at 298, 308 and 318 K using WL/MG and WL- $\gamma$ -APS/MG adsorbents

|                      | H <sub>2</sub> PO <sub>4</sub> <sup>-</sup> /HPO <sub>4</sub> <sup>2-</sup> |                                               |                                   |                                                |                       | HCrO <sub>4</sub> <sup>-</sup> /CrO <sub>4</sub> <sup>2-</sup> |                                   |                                                |                       |  |
|----------------------|-----------------------------------------------------------------------------|-----------------------------------------------|-----------------------------------|------------------------------------------------|-----------------------|----------------------------------------------------------------|-----------------------------------|------------------------------------------------|-----------------------|--|
|                      | <i>T</i><br>(K)                                                             | <i>q<sub>e</sub></i><br>(mg g <sup>-1</sup> ) | <i>K</i><br>(l mg <sup>-1</sup> ) | <i>K<sub>L</sub></i><br>(l mol <sup>-1</sup> ) | <i>R</i> <sup>2</sup> | <i>q<sub>e</sub></i><br>(mg g <sup>-1</sup> )                  | <i>K</i><br>(l mg <sup>-1</sup> ) | <i>K<sub>L</sub></i><br>(l mol <sup>-1</sup> ) | <i>R</i> <sup>2</sup> |  |
| WL/MG                | 298                                                                         | 45.789                                        | 5.073                             | 8721609                                        | 0.996                 | 43.993                                                         | 6.069                             | 17513050                                       | 0.999                 |  |
|                      | 308                                                                         | 47.316                                        | 5.404                             | 9290532                                        | 0.996                 | 45.099                                                         | 6.542                             | 18878895                                       | 0.995                 |  |
|                      | 318                                                                         | 48.643                                        | 6.331                             | 10884022                                       | 0.981                 | 47.621                                                         | 6.951                             | 20059692                                       | 0.979                 |  |
| WL- $\gamma$ -APS/MG | 298                                                                         | 60.718                                        | 6.137                             | 10550703                                       | 0.989                 | 62.966                                                         | 4.660                             | 13447961                                       | 0.995                 |  |
|                      | 308                                                                         | 63.094                                        | 7.211                             | 12395819                                       | 0.989                 | 63.222                                                         | 7.098                             | 20481959                                       | 0.997                 |  |
|                      | 318                                                                         | 64.118                                        | 12.90                             | 22175573                                       | 0.987                 | 63.346                                                         | 8.014                             | 23126029                                       | 0.996                 |  |

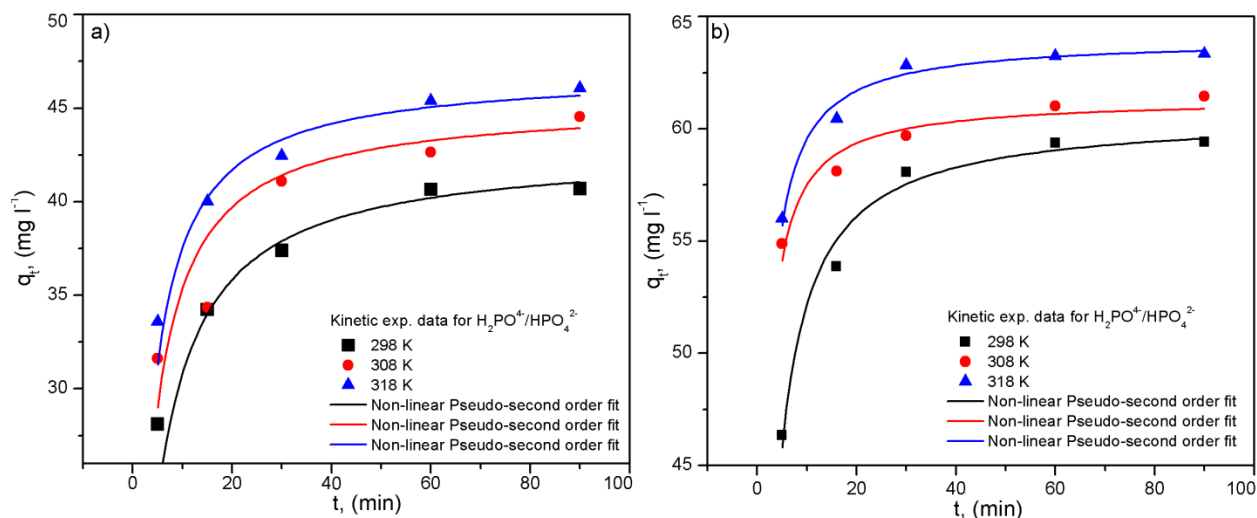

**Figure S6.** Plot of non-linear pseudo-second-order for H<sub>2</sub>PO<sub>4</sub><sup>-</sup>/HPO<sub>4</sub><sup>2-</sup> ions removal by using a) WL-MG and b) WL- $\gamma$ -APS/MG at 298, 308 and 318 K (*C<sub>i</sub>*(H<sub>2</sub>PO<sub>4</sub><sup>-</sup>/HPO<sub>4</sub><sup>2-</sup>) = 10 ppm, *m/V* = 125 mg l<sup>-1</sup>, pH 6.5 for H<sub>2</sub>PO<sub>4</sub><sup>-</sup>/HPO<sub>4</sub><sup>2-</sup>)

**Table S4.** Kinetic parameters obtained by the use of linear PSO kinetic model for the Cd<sup>2+</sup>, Ni<sup>2+</sup>, HCrO<sub>4</sub><sup>-</sup>/CrO<sub>4</sub><sup>2-</sup> and H<sub>2</sub>PO<sub>4</sub><sup>-</sup>/HPO<sub>4</sub><sup>2-</sup> removal using WL/MG and WL-γ-APS/MG adsorbents

| 298 K       |                                                                          |                                                                             |                                                                |
|-------------|--------------------------------------------------------------------------|-----------------------------------------------------------------------------|----------------------------------------------------------------|
|             | Pseudo-second order                                                      | Cd <sup>2+</sup>                                                            | Ni <sup>2+</sup>                                               |
| WL/MG       | k <sub>2</sub> x10 <sup>-2</sup> (g mg <sup>-1</sup> min <sup>-1</sup> ) | 0.181±0.031                                                                 | 0.184±0.015                                                    |
|             | q <sub>e</sub> (mg g <sup>-1</sup> )                                     | 56.665±1.045                                                                | 56.134±1.812                                                   |
|             | R <sup>2</sup>                                                           | 0.999                                                                       | 0.998                                                          |
| WL-γ-APS/MG | k <sub>2</sub> x10 <sup>-2</sup> (g mg <sup>-1</sup> min <sup>-1</sup> ) | 1.510±0.032                                                                 | 1.478±0.001                                                    |
|             | q <sub>e</sub> (mg g <sup>-1</sup> )                                     | 69.512±1.152                                                                | 62.020±1.172                                                   |
|             | R <sup>2</sup>                                                           | 0.990                                                                       | 0.995                                                          |
|             | Pseudo-second order                                                      | H <sub>2</sub> PO <sub>4</sub> <sup>-</sup> /HPO <sub>4</sub> <sup>2-</sup> | HCrO <sub>4</sub> <sup>-</sup> /CrO <sub>4</sub> <sup>2-</sup> |
| WL/MG       | k <sub>2</sub> x10 <sup>-2</sup> (g mg <sup>-1</sup> min <sup>-1</sup> ) | 0.239±0.022                                                                 | 0.233±0.033                                                    |
|             | q <sub>e</sub> (mg g <sup>-1</sup> )                                     | 48.353±1.240                                                                | 47.531±1.145                                                   |
|             | R <sup>2</sup>                                                           | 0.990                                                                       | 0.993                                                          |
| WL-γ-APS/MG | k <sub>2</sub> x10 <sup>-2</sup> (g mg <sup>-1</sup> min <sup>-1</sup> ) | 1.044±0.011                                                                 | 0.864±0.019                                                    |
|             | q <sub>e</sub> (mg g <sup>-1</sup> )                                     | 60.546±0.919                                                                | 61.390±1.198                                                   |
|             | R <sup>2</sup>                                                           | 0.997                                                                       | 0.998                                                          |
|             | Ea (kJ mol <sup>-1</sup> )                                               | 22.41                                                                       | 25.35                                                          |
| 308 K       |                                                                          |                                                                             |                                                                |
|             | Pseudo-second order                                                      | Cd <sup>2+</sup>                                                            | Ni <sup>2+</sup>                                               |
| WL/MG       | k <sub>2</sub> x10 <sup>-2</sup> (g mg <sup>-1</sup> min <sup>-1</sup> ) | 0.242±0.022                                                                 | 0.187±0.077                                                    |
|             | q <sub>e</sub> (mg g <sup>-1</sup> )                                     | 58.646±0.837                                                                | 56.134±0.593                                                   |
|             | R <sup>2</sup>                                                           | 0.987                                                                       | 0.998                                                          |
| WL-γ-APS/MG | k <sub>2</sub> x10 <sup>-2</sup> (g mg <sup>-1</sup> min <sup>-1</sup> ) | 1.671±0.017                                                                 | 1.645±0.151                                                    |
|             | q <sub>e</sub> (mg g <sup>-1</sup> )                                     | 70.419±1.121                                                                | 62.930±0.687                                                   |
|             | R <sup>2</sup>                                                           | 0.999                                                                       | 0.998                                                          |
|             | Pseudo-second order                                                      | H <sub>2</sub> PO <sub>4</sub> <sup>-</sup> /HPO <sub>4</sub> <sup>2-</sup> | HCrO <sub>4</sub> <sup>-</sup> /CrO <sub>4</sub> <sup>2-</sup> |
| WL/MG       | k <sub>2</sub> x10 <sup>-2</sup> (g mg <sup>-1</sup> min <sup>-1</sup> ) | 0.377±0.015                                                                 | 0.261±0.028                                                    |
|             | q <sub>e</sub> (mg g <sup>-1</sup> )                                     | 48.933±1.024                                                                | 48.366±1.268                                                   |
|             | R <sup>2</sup>                                                           | 0.995                                                                       | 0.994                                                          |
| WL-γ-APS/MG | k <sub>2</sub> x10 <sup>-2</sup> (g mg <sup>-1</sup> min <sup>-1</sup> ) | 1.217±0.025                                                                 | 1.113±0.058                                                    |
|             | q <sub>e</sub> (mg g <sup>-1</sup> )                                     | 62.818±0.968                                                                | 63.307±1.205                                                   |
|             | R <sup>2</sup>                                                           | 0.999                                                                       | 0.998                                                          |
| 318 K       |                                                                          |                                                                             |                                                                |
|             | Pseudo-second order                                                      | Cd <sup>2+</sup>                                                            | Ni <sup>2+</sup>                                               |
| WL/MG       | k <sub>2</sub> x10 <sup>-2</sup> (g mg <sup>-1</sup> min <sup>-1</sup> ) | 0.308±0.027                                                                 | 0.233±0.010                                                    |
|             | q <sub>e</sub> (mg g <sup>-1</sup> )                                     | 59.145±1.066                                                                | 59.420±1.078                                                   |
|             | R <sup>2</sup>                                                           | 0.9997                                                                      | 0.996                                                          |
| WL-γ-APS/MG | k <sub>2</sub> x10 <sup>-2</sup> (g mg <sup>-1</sup> min <sup>-1</sup> ) | 2.104±0.002                                                                 | 2.109±0.001                                                    |
|             | q <sub>e</sub> (mg g <sup>-1</sup> )                                     | 73.560±1.057                                                                | 66.157±1.102                                                   |
|             | R <sup>2</sup>                                                           | 0.999                                                                       | 0.999                                                          |
|             | Pseudo-second order                                                      | H <sub>2</sub> PO <sub>4</sub> <sup>-</sup> /HPO <sub>4</sub> <sup>2-</sup> | HCrO <sub>4</sub> <sup>-</sup> /CrO <sub>4</sub> <sup>2-</sup> |
| WL/MG       | k <sub>2</sub> x10 <sup>-2</sup> (g mg <sup>-1</sup> min <sup>-1</sup> ) | 0.404±0.028                                                                 | 0.447±0.013                                                    |
|             | q <sub>e</sub> (mg g <sup>-1</sup> )                                     | 50.474±1.201                                                                | 48.996±0.987                                                   |
|             | R <sup>2</sup>                                                           | 0.996                                                                       | 0.999                                                          |
| WL-γ-APS/MG | k <sub>2</sub> x10 <sup>-2</sup> (g mg <sup>-1</sup> min <sup>-1</sup> ) | 1.848±0.087                                                                 | 1.576±0.013                                                    |
|             | q <sub>e</sub> (mg g <sup>-1</sup> )                                     | 63.9997±1.021                                                               | 63.654±0.987                                                   |
|             | R <sup>2</sup>                                                           | 0.999                                                                       | 0.999                                                          |



## Adsorption kinetic study

General uptake mechanism, analyzed according to pseudo-second-order equation, consider one rate controlling step and did not offer valuable information on adsorption mechanism. Therefore, the intra-particle diffusion model *i.e.* Weber-Morris model, was applied to analyze mass transfer phenomena of overall process. Kinetic model consider four consecutive steps: adsorbate transport in the bulk, diffusion through the liquid film surrounding the surface of the particle (external mass transfer or film diffusion), diffusion through the pores inside of particles (intra-particle diffusion) and last step is a chemical reaction (adsorption/desorption) of adsorbate with active sites present at surface matrix, *i.e.* mass action.

**Table S5.** Kinetic parameters obtained by the use of interparticle diffusion Weber-Morris model for the  $\text{Cd}^{2+}$ ,  $\text{Ni}^{2+}$ ,  $\text{HCrO}_4^-/\text{CrO}_4^{2-}$  and  $\text{H}_2\text{PO}_4^-/\text{HPO}_4^{2-}$  removal using WL/MG and WL- $\gamma$ -APS/MG adsorbents

| 298 K                |                                                   |                                             |                                     |
|----------------------|---------------------------------------------------|---------------------------------------------|-------------------------------------|
|                      | Weber-Morris                                      | $\text{Cd}^{2+}$                            | $\text{Ni}^{2+}$                    |
| WL/MG                | $k_{p1}$ ( $\text{mg g}^{-1} \text{min}^{-0.5}$ ) | 4.767±0.112                                 | 4.769±0.012                         |
|                      | $C_1$ ( $\text{mg g}^{-1}$ )                      | 13.959±0.982                                | 14.202±0.915                        |
|                      | $k_{p2}$ ( $\text{mg g}^{-1} \text{min}^{-0.5}$ ) | 0.015±0.002                                 | 0.062±0.001                         |
|                      | $C_2$ ( $\text{mg g}^{-1}$ )                      | 50.588±1.002                                | 47.770±1.151                        |
|                      | $R^2$                                             | 0.999                                       | 0.984                               |
| WL- $\gamma$ -APS/MG | $k_{p1}$ ( $\text{mg g}^{-1} \text{min}^{-0.5}$ ) | 5.196±0.210                                 | 5.196±0.021                         |
|                      | $C_1$ ( $\text{mg g}^{-1}$ )                      | 44.992±0.887                                | 37.492±1.025                        |
|                      | $k_{p2}$ ( $\text{mg g}^{-1} \text{min}^{-0.5}$ ) | 0.176±0.004                                 | 0.175±0.001                         |
|                      | $C_2$ ( $\text{mg g}^{-1}$ )                      | 67.073±0.960                                | 59.566±0.998                        |
|                      | $R^2$                                             | 0.903                                       | 0.934                               |
|                      | Weber-Morris                                      | $\text{H}_2\text{PO}_4^-/\text{HPO}_4^{2-}$ | $\text{HCrO}_4^-/\text{CrO}_4^{2-}$ |
| WL/MG                | $k_{p1}$ ( $\text{mg g}^{-1} \text{min}^{-0.5}$ ) | 0.944±0.011                                 | 2.529±0.102                         |
|                      | $C_1$ ( $\text{mg g}^{-1}$ )                      | 26.062±1.140                                | 15.299±1.028                        |
|                      | $k_{p2}$ ( $\text{mg g}^{-1} \text{min}^{-0.5}$ ) | 0.0862±0.001                                | 0.939±0.024                         |
|                      | $C_2$ ( $\text{mg g}^{-1}$ )                      | 43.657±1.215                                | 34.580±1.020                        |
|                      | $R^2$                                             | 0.999                                       | 0.874                               |
| WL- $\gamma$ -APS/MG | $k_{p1}$ ( $\text{mg g}^{-1} \text{min}^{-0.5}$ ) | 3.999±0.109                                 | 4.034±0.112                         |
|                      | $C_1$ ( $\text{mg g}^{-1}$ )                      | 37.426±0.982                                | 38.254±1.117                        |
|                      | $k_{p2}$ ( $\text{mg g}^{-1} \text{min}^{-0.5}$ ) | 0.203±0.005                                 | 0.849±0.0125                        |
|                      | $C_2$ ( $\text{mg g}^{-1}$ )                      | 57.636±1.057                                | 52.561±0.012                        |
|                      | $R^2$                                             | 0.897                                       | 0.998                               |

**Table S6.** Comparison of adsorbents WL and magnetite based adsorbent for heavy metal and oxyions adsorption

| Adsorbent                         | Ion                                                                         | $C_i$ , mg l <sup>-1</sup> | $q_e$ , mg g <sup>-1</sup> | reference               |
|-----------------------------------|-----------------------------------------------------------------------------|----------------------------|----------------------------|-------------------------|
| Wollastonite                      | Ni <sup>2+</sup>                                                            | 50.0                       | 6.50                       | (Sharma et al. 1990)    |
| Wollastonite                      | HCrO <sub>4</sub> <sup>-</sup> /CrO <sub>4</sub> <sup>2-</sup>              | 5.0                        | 21.92                      | (Obradović et al. 2017) |
| Wollastonite                      | phosphate ions                                                              | 5.0                        | 27.29                      | (Obradović et al. 2017) |
| QFW*                              | Cr <sup>6+</sup>                                                            | 10.0                       | 9.81                       | (Petrova et al. 2011)   |
| Magnetite nanoparticles           | Cr <sup>6+</sup>                                                            | 80.0                       | 13.5 (pH 2.5)              | (Martínez et al. 2015)  |
| MG nanospheres                    | Cr <sup>6+</sup>                                                            | 10.0                       | 8.90 (45°C)                | (Kumari et al. 2015)    |
| Sulfate-modified MG nanoparticles | Cd <sup>2+</sup>                                                            | -                          | 7.90                       | (Babaei et al. 2014)    |
| Synthetic mineral adsorbent**     | Cd <sup>2+</sup>                                                            | -                          | 47.0                       | (Chen et al. 2017)      |
| W-MG                              | Ni <sup>2+</sup>                                                            | 10.0                       | 52.41                      | This work               |
| W-MG                              | Cd <sup>2+</sup>                                                            | 10.0                       | 55.75                      | This work               |
| W-MG                              | HCrO <sub>4</sub> <sup>-</sup> /CrO <sub>4</sub> <sup>2-</sup>              | 10.0                       | 47.62                      | This work               |
| W-MG                              | H <sub>2</sub> PO <sub>4</sub> <sup>-</sup> /HPO <sub>4</sub> <sup>2-</sup> | 10.0                       | 48.64                      | This work               |
| WL-γ-APS/MG                       | Ni <sup>2+</sup>                                                            | 10.0                       | 66.14                      | This work               |
| WL-γ-APS/MG                       | Cd <sup>2+</sup>                                                            | 10.0                       | 73.15                      | This work               |
| WL-γ-APS/MG                       | HCrO <sub>4</sub> <sup>-</sup> /CrO <sub>4</sub> <sup>2-</sup>              | 10.0                       | 63.35                      | This work               |
| WL-γ-APS/MG                       | H <sub>2</sub> PO <sub>4</sub> <sup>-</sup> /HPO <sub>4</sub> <sup>2-</sup> | 10.0                       | 64.12                      | This work               |

\*QFW-quartz/feldspar/wollastonite; \*\* Synthetic mineral adsorbent containing wollastonite, illite, gypsum, limestone and dolomite

## References

- Babaei AA, Bahrami M, Farrokhian Firouzi A, et al (2014) Adsorption of cadmium onto modified nanosized magnetite: kinetic modeling, isotherm studies, and process optimization. *Desalin Water Treat* 1–13. doi: 10.1080/19443994.2014.972986
- Chen G, Shah KJ, Shi L, Chiang P-C (2017) Removal of Cd(II) and Pb(II) ions from aqueous solutions by synthetic mineral adsorbent: Performance and mechanisms. *Appl Surf Sci* 409:296–305. doi: 10.1016/j.apsusc.2017.03.022
- Kumari M, Pittman CU, Mohan D (2015) Heavy metals [chromium (VI) and lead (II)] removal from water using mesoporous magnetite (Fe<sub>3</sub>O<sub>4</sub>) nanospheres. *J Colloid Interface Sci* 442:120–132. doi: 10.1016/j.jcis.2014.09.012
- Martínez LJ, Muñoz-Bonilla A, Mazario E, et al (2015) Adsorption of chromium(VI) onto electrochemically obtained magnetite nanoparticles. *Int J Environ Sci Technol* 12:4017–4024. doi: 10.1007/s13762-015-0832-z

- Obradović N, Filipović S, Marković S, et al (2017) Influence of different pore-forming agents on wollastonite microstructures and adsorption capacities. *Ceram Int* 43:7461–7468. doi: 10.1016/j.ceramint.2017.03.021
- Petrova TM, Fachikov L, Hristov J (2011) the magnetite as adsorbent for some hazardous species from aqueous solution: A review. *Int Rev Chem Eng Int Rev Chem Eng* 3:134–152
- Sharma YC, Gupta GS, Prasad G, Rupainwar DC (1990) Use of wollastonite in the removal of Ni(II) from aqueous solutions. *Water Air Soil Pollut* 49:69–79. doi: 10.1007/BF00279511
